# Supplementary material
Source: Royal Society of Chemistry journal article supplement (doi:10.1039/d6nj00490c)
Supplement: d6nj00490c1.pdf [file d6nj00490c1.pdf]

## Supplementary Information

### Novel OSDA-Synthesized EUO Zeolites with High Catalytic Performance in C8 Aromatic Isomerization

Jiayin Wang<sup>a</sup>, Yun Wang<sup>a</sup>, Yunlong Ding<sup>a</sup>, Ning Li<sup>a</sup>, Zelong Li<sup>a</sup>, Yaning Liang, Lixia  
Ling<sup>a</sup>, Xiaofeng Li<sup>a</sup>.

<sup>a</sup> College of Chemistry and Chemical Engineering, Taiyuan University of

Technology, Taiyuan 030024, Shanxi, China

<sup>b</sup> Sinopec Catalyst (Beijing) Co., 102400, Beijing, China

E-mail address: [13994265785@163.com](mailto:13994265785@163.com)

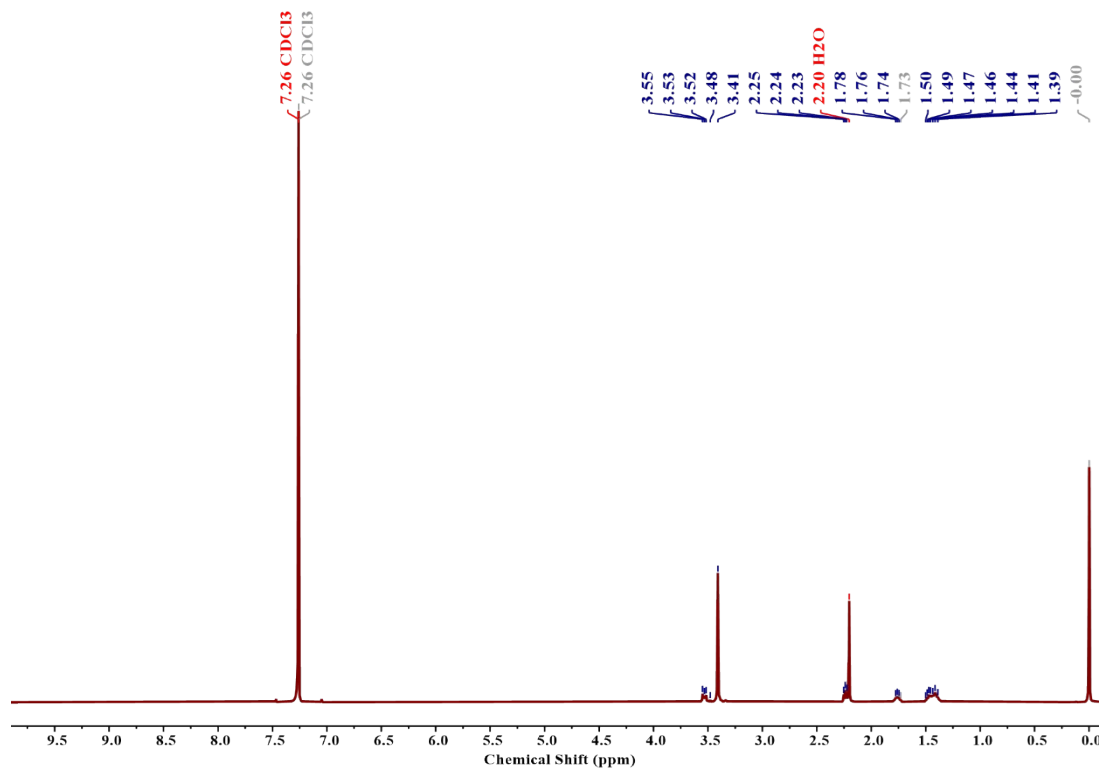

Fig. S1 <sup>1</sup>H NMR spectrum of HMC

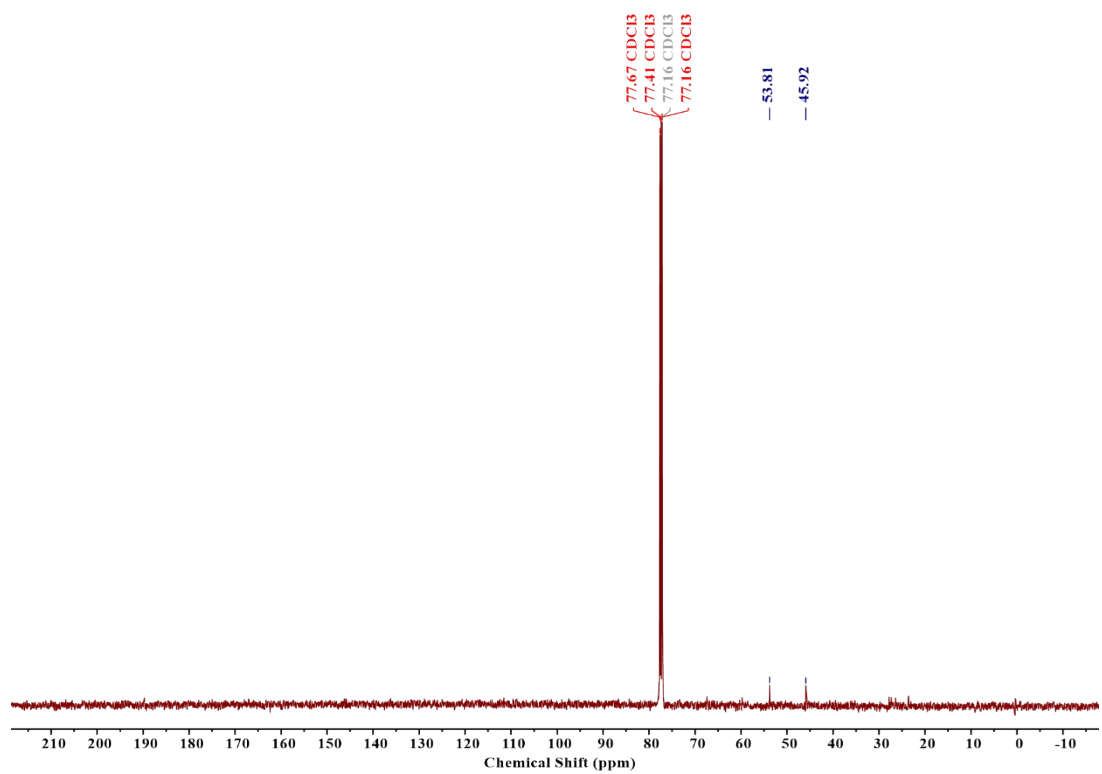

**Fig. S2**  $^{13}\text{C}$ NMR spectrum of HMC.

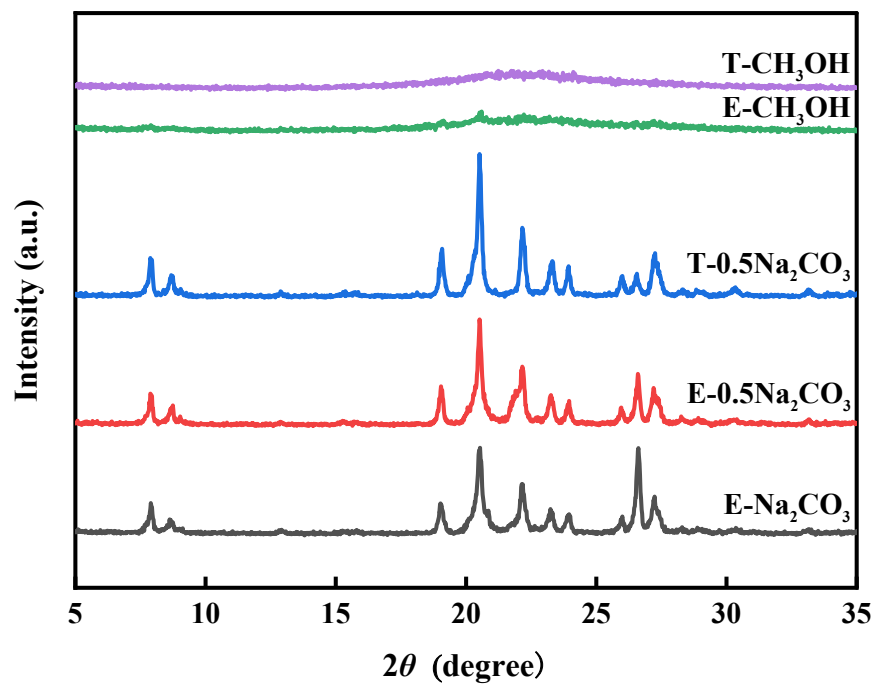

**Fig. S3** XRD patterns of zeolites synthesized under different experimental conditions.

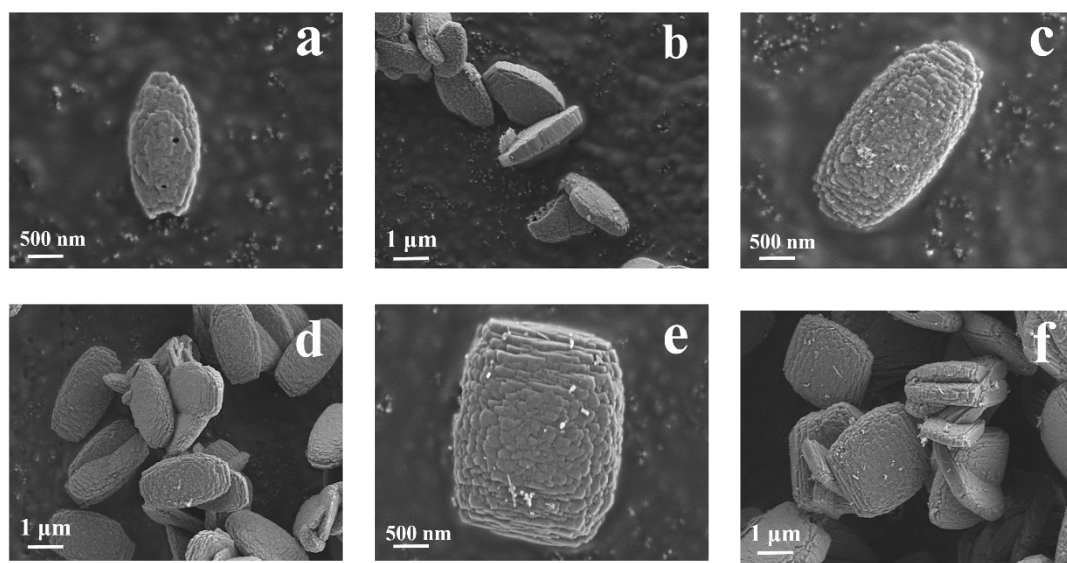

**Fig. S4** SEM images of zeolites synthesized under different experimental conditions: (a, b) E- $\text{Na}_2\text{CO}_3$ ; (c, d) E-0.5 $\text{Na}_2\text{CO}_3$ ; (e, f) T-0.5 $\text{NaOH}$ .

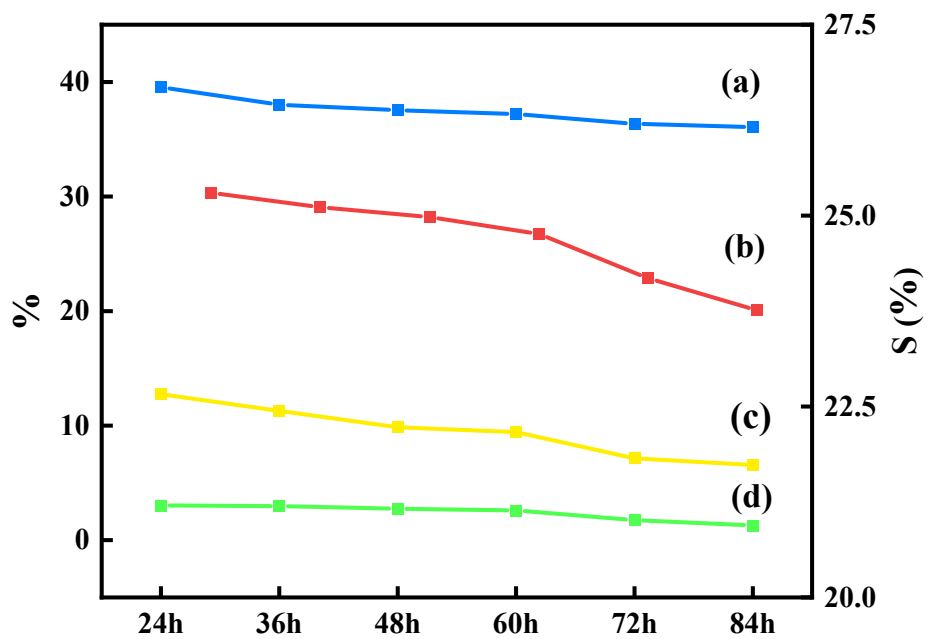

**Fig. S5** Stability evaluation of the catalytic performance of the catalyst over a reaction time of 24-84 h. Left axis: (a) M-xylene conversion, (c) Ethylbenzene conversion, (d) Xylene loss. Right axis: (b) Isomerization activity (S).

**Table S1** Bulk and surface Si/Al ratios of the zeolites determined by XRF and XPS.

| Sample        | Surface (Si/Al) | Bulk (Si/Al) | Surface/Bulk |
|---------------|-----------------|--------------|--------------|
| T-45          | 17.11           | 60.228       | 0.28         |
| E-45          | 21.43           | 45.126       | 0.48         |
| T-45-calcined | 20.59           |              |              |

**Table S2** C8 aromatic product distribution over the catalyst at different reaction times (24-84 h).

| Product<br>distribution (%) | Catalyst |       |       |       |       |       |
|-----------------------------|----------|-------|-------|-------|-------|-------|
|                             | 36h      | 48h   | 60h   | 72h   | 96h   | 120h  |
| Benzene                     | 0.28     | 0.23  | 0.26  | 0.24  | 0.21  | 0.17  |
| Toluene                     | 1.17     | 0.97  | 1.04  | 0.91  | 0.72  | 0.56  |
| Ethylbenzene                | 6.05     | 6.21  | 6.31  | 6.34  | 6.50  | 6.54  |
| <i>Para</i> -xylene         | 22.93    | 22.81 | 22.72 | 22.55 | 22.19 | 21.91 |
| <i>Meta</i> -xylene         | 56.27    | 57.64 | 58.09 | 58.41 | 59.19 | 59.36 |
| <i>Ortho</i> -xylene        | 11.25    | 10.36 | 10.13 | 9.11  | 10.36 | 10.83 |
| Trimethylbenzene            | 0.91     | 0.73  | 0.58  | 0.62  | 0.48  | 0.45  |
